# Supplementary material
Source: PubMed Central journal article supplement (PMC3515028)
Supplement: chest_142_6_1545_ds01.pdf [file chest_142_6_1545_ds01.pdf]

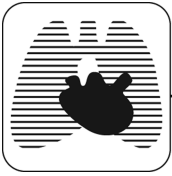

## Optimizing the 6-Min Walk Test as a Measure of Exercise Capacity in COPD

Divay Chandra, MD; Robert A. Wise, MD, FCCP; Hrishikesh S. Kulkarni, MD; Roberto P. Benzo, MD, FCCP; Gerard Criner, MD, FCCP; Barry Make, MD, FCCP; William A. Slivka, RPFT; Andrew L. Ries, MD, MPH, FCCP; John J. Reilly, MD, FCCP; Fernando J. Martinez, MD, FCCP; and Frank C. Sciurba, MD, FCCP; on behalf of the NETT Research Group

### e-Appendix 1.

#### NETT Credit Roster

##### *Members of the NETT Research Group:*

Office of the Chair of the Steering Committee, University of Pennsylvania, Philadelphia, PA: Alfred P. Fishman, MD (Chair); Betsy Ann Bozzarello; Ameena Al-Amin.

#### Clinical centers

*Baylor College of Medicine, Houston, TX:* Marcia Katz, MD (Principal Investigator); Carolyn Wheeler, RN, BSN (Principal Clinic Coordinator); Elaine Baker, RRT, RPFT; Peter Barnard, PhD, RPFT; Phil Cagle, MD; James Carter, MD; Sophia Chatziioannou, MD; Karla Conejo-Gonzales; Kimberly Dubose, RRT; John Haddad, MD; David Hicks, RRT, RPFT; Neal Kleiman, MD; Mary Milburn-Barnes, CRTT; Chinh Nguyen, RPFT; Michael Reardon, MD; Joseph Reeves-Viets, MD; Steven Sax, MD; Amir Sharafkhaneh, MD; Owen Wilson, PhD; Christine Young PT; Rafael Espada, MD (Principal Investigator 1996-2002); Rose Butanda (1999-2001); Minnie Ellisor (2002); Pamela Fox, MD (1999-2001); Katherine Hale, MD (1998-2000); Everett Hood, RPFT (1998 B 2000); Amy Jahn (1998-2000); Satish Jhingran, MD (1998-2001); Karen King, RPFT (1998-1999); Charles Miller III, PhD (1996-1999); Imran Nizami, MD (Co-Principal Investigator, 2000-2001); Todd Officer (1998-2000); Jeannie Ricketts (1998 -2000); Joe Rodarte, MD (Co-Principal Investigator 1996-2000); Robert Teague, MD (Co-Principal Investigator 1999-2000); Kedren Williams (1998-1999).

*Brigham and Women's Hospital, Boston, MA:* John Reilly, MD (Principal Investigator); David Sugarbaker, MD (Co-Principal Investigator); Carol Fanning, RRT (Principal Clinic Coordinator); Simon Body, MD; Sabine Duffy, MD; Vladimir Formanek, MD; Anne Fuhlbrigge, MD; Philip Hartigan, MD; Sarah Hooper, EP; Andetta Hunsaker, MD; Francine Jacobson, MD; Marilyn Moy, MD; Susan Peterson, RRT; Roger Russell, MD; Diane Saunders; Scott Swanson, MD (Co-Principal Investigator, 1996-2001).

*Cedars-Sinai Medical Center, Los Angeles, CA:* Rob McKenna, MD (Principal Investigator); Zab Mohsenifar, MD (Co-Principal Investigator); Carol Geaga, RN (Principal Clinic Coordinator); Manmohan Biring, MD; Susan Clark,



RN, MN; Jennifer Cutler, MD; Robert Frantz, MD; Peter Julien, MD; Michael Lewis, MD; Jennifer Minkoff-Rau, MSW; Valentina Yegyan, BS, CPFT; Milton Joyner, BA (1996-2002).

*Cleveland Clinic Foundation, Cleveland, OH:* Malcolm DeCamp, MD (Principal Investigator); James Stoller, MD (Co-Principal Investigator); Yvonne Meli, RN,C (Principal Clinic Coordinator); John Apostolakis, MD; Darryl Atwell, MD; Jeffrey Chapman, MD; Pierre DeVilliers, MD; Raed Dweik, MD; Erik Kraenzler, MD; Rosemary Lann, LISW; Nancy Kurokawa, RRT, CPFT; Scott Marlow, RRT; Kevin McCarthy, RCPT; Priscilla McCreight, RRT, CPFT; Atul Mehta, MD; Moulay Meziane, MD; Omar Minai, MD; Mindi Steiger, RRT; Kenneth White, RPFT; Janet Maurer, MD (Principal Investigator, 1996-2001); Terri Durr, RN (2000-2001); Charles Hearn, DO (1998-2001); Susan Lubell, PA-C (1999-2000); Peter O'Donovan, MD (1998-2003); Robert Schilz, DO (1998-2002).

*Columbia University, New York, NY in consortium with Long Island Jewish Medical Center, New Hyde Park, NY:* Mark Ginsburg, MD (Principal Investigator); Byron Thomashow, MD (Co-Principal Investigator); Patricia Jellen, MSN, RN (Principal Clinic Coordinator); John Austin, MD; Matthew Bartels, MD; Yahya Berkmen, MD; Patricia Berkoski, MS, RRT (Site coordinator, LIJ); Frances Brogan, MSN, RN; Amy Chong, BS, CRT; Glenda DeMercado, BSN; Angela DiMango, MD; Sandy Do, MS, PT; Bessie Kachulis, MD; Arfa Khan, MD; Berend Mets, MD; Mitchell O'Shea, BS, RT, CPFT; Gregory Pearson, MD; Leonard Rossoff, MD; Steven Scharf, MD, PhD (Co-Principal Investigator, 1998-2002); Maria Shiau, MD; Paul Simonelli, MD; Kim Stavrolakes, MS, PT; Donna Tsang, BS; Denise Vilotijevic, MS, PT; Chun Yip, MD; Mike Mantinaos, MD (1998-2001); Kerri McKeon, BS, RRT, RN (1998-1999); Jacqueline Pfeffer, MPH, PT (1997-2002).

*Duke University Medical Center, Durham, NC:* Neil MacIntyre, MD (Principal Investigator); R. Duane Davis, MD (Co-Principal Investigator); John Howe, RN (Principal Clinic Coordinator); R. Edward Coleman, MD; Rebecca Crouch, RPT; Dora Greene; Katherine Grichnik, MD; David Harpole, Jr., MD; Abby Krichman, RRT; Brian Lawlor, RRT; Holman McAdams, MD; John Plankeel, MD; Susan Rinaldo-Gallo, MED; Sheila Shearer, RRT; Jeanne Smith, ACSW; Mark Stafford-Smith, MD; Victor Tapson, MD; Mark Steele, MD (1998-1999); Jennifer Norten, MD (1998-1999).

*Mayo Foundation, Rochester, MN:* James Utz, MD (Principal Investigator); Claude Deschamps, MD (Co-Principal Investigator); Kathy Mieras, CCRP (Principal Clinic Coordinator); Martin Abel, MD; Mark Allen, MD; Deb Andrist, RN; Gregory Aughenbaugh, MD; Sharon Bendel, RN; Eric Edell, MD; Marlene Edgar; Bonnie Edwards; Beth Elliot, MD; James Garrett, RRT; Delmar Gillespie, MD; Judd Gurney, MD; Boleyn Hammel; Karen Hanson, RRT; Lori Hanson, RRT; Gordon Harms, MD; June Hart; Thomas Hartman, MD; Robert Hyatt, MD; Eric Jensen, MD; Nicole Jenson, RRT; Sanjay Kalra, MD; Philip Karsell, MD; Jennifer Lamb; David Midthun, MD; Carl Mottram, RRT; Stephen Swensen, MD; Anne-Marie Sykes, MD; Karen Taylor; Norman Torres, MD; Rolf Hubmayr, MD (1998-2000); Daniel Miller, MD (1999-2002); Sara Bartling, RN (1998-2000); Kris Bradt (1998-2002).

*National Jewish Medical and Research Center, Denver, CO:* Barry Make, MD (Principal Investigator); Marvin Pomerantz, MD (Co-Principal Investigator); Mary Gilmartin, RN, RRT (Principal Clinic Coordinator); Joyce

*Online supplements are not copyedited prior to posting.*



Canterbury; Martin Carlos; Phyllis Dibbern, PT; Enrique Fernandez, MD; Lisa Geyman, MSPT; Connie Hudson; David Lynch, MD; John Newell, MD; Robert Quaife, MD; Jennifer Propst, RN; Cynthia Raymond, MS; Jane Whalen-Price, PT; Kathy Winner, OTR; Martin Zamora, MD; Reuben Cherniack, MD (Principal Investigator, 1997-2000).

*Ohio State University, Columbus, OH:* Philip Diaz, MD (Principal Investigator); Patrick Ross, MD (Co-Principal Investigator); Tina Bees (Principal Clinic Coordinator); Jan Drake; Charles Emery, PhD; Mark Gerhardt, MD, PhD; Mark King, MD; David Rittinger; Mahasti Rittinger.

*Saint Louis University, Saint Louis, MO:* Keith Naunheim, MD (Principal Investigator); Robert Gerber, MD (Co-Principal Investigator); Joan Osterloh, RN, MSN (Principal Clinic Coordinator); Susan Borosh; Willard Chamberlain, DO; Sally Frese; Alan Hibbit; Mary Ellen Kleinhenz, MD; Gregg Ruppel; Cary Stolar, MD; Janice Willey; Francisco Alvarez, MD (Co-Principal Investigator, 1999-2002); Cesar Keller, MD (Co-Principal Investigator, 1996-2000).

*Temple University, Philadelphia, PA:* Gerard Criner, MD (Principal Investigator); Satoshi Furukawa, MD (Co-Principal Investigator); Anne Marie Kuzma, RN, MSN (Principal Clinic Coordinator); Roger Barnette, MD; Neil Brister, MD; Kevin Carney, RN, CCTC; Wissam Chatila, MD; Francis Cordova, MD; Gilbert D'Alonzo, DO; Michael Keresztury, MD; Karen Kirsch; Chul Kwak, MD; Kathy Lautensack, RN, BSN; Madelina Lorenzon, CPFT; Ubaldo Martin, MD; Peter Rising, MS; Scott Schartel, MD; John Travaline, MD; Gwendolyn Vance, RN, CCTC; Phillip Boiselle, MD (1997-2000); Gerald O'Brien, MD (1997-2000).

*University of California, San Diego, San Diego, CA:* Andrew Ries, MD, MPH (Principal Investigator); Robert Kaplan, PhD (Co-Principal Investigator); Catherine Ramirez, BS, RCP (Principal Clinic Coordinator); David Frankville, MD; Paul Friedman, MD; James Harrell, MD; Jeffery Johnson; David Kapelanski, MD; David Kupferberg, MD, MPH; Catherine Larsen, MPH; Trina Limberg, RRT; Michael Magliocca, RN, CNP; Frank J. Papatheofanis, MD, PhD; Dawn Sassi-Dambron, RN; Melissa Weeks.

*University of Maryland at Baltimore, Baltimore, MD in consortium with Johns Hopkins Hospital, Baltimore, MD:* Mark Krasna, MD (Principal Investigator); Henry Fessler, MD (Co-Principal Investigator); Iris Moskowitz (Principal Clinic Coordinator); Timothy Gilbert, MD; Jonathan Orens, MD; Steven Scharf, MD, PhD; David Shade; Stanley Siegelman, MD; Kenneth Silver, MD; Clarence Weir; Charles White, MD.

*University of Michigan, Ann Arbor, MI:* Fernando Martinez, MD (Principal Investigator); Mark Iannettoni, MD (Co-Principal Investigator); Catherine Meldrum, BSN, RN, CCRN (Principal Clinic Coordinator); William Bria, MD; Kelly Campbell; Paul Christensen, MD; Kevin Flaherty, MD; Steven Gay, MD; Paramjit Gill, RN; Paul Kazanjian, MD; Ella Kazerooni, MD; Vivian Knieper; Tammy Ojo, MD; Lewis Poole; Leslie Quint, MD; Paul Rysso; Thomas Sisson, MD; Mercedes True; Brian Woodcock, MD; Lori Zarembo, RN.

*Online supplements are not copyedited prior to posting.*



*University of Pennsylvania, Philadelphia, PA:* Larry Kaiser, MD (Principal Investigator); John Hansen-Flaschen, MD (Co-Principal Investigator); Mary Louise Dempsey, BSN, RN (Principal Clinic Coordinator); Abass Alavi, MD; Theresa Alcorn, Selim Arcasoy, MD; Judith Aronchick, MD; Stanley Aukberg, MD; Bryan Benedict, RRT; Susan Craemer, BS, RRT, CPFT; Ron Daniele, MD; Jeffrey Edelman, MD; Warren Gefter, MD; Laura Kotler-Klein, MSS; Robert Kotloff, MD; David Lipson, MD; Wallace Miller, Jr., MD; Richard O'Connell, RPFT; Staci Opeleman, MSW; Harold Palevsky, MD; William Russell, RPFT; Heather Sheaffer, MSW; Rodney Simcox, BSRT, RRT; Susanne Snedeker, RRT, CPFT; Jennifer Stone-Wynne, MSW; Gregory Tino, MD; Peter Wahl; James Walter, RPFT; Patricia Ward; David Zisman, MD; James Mendez, MSN, CRNP (1997-2001); Angela Wurster, MSN, CRNP (1997-1999).

*University of Pittsburgh, Pittsburgh, PA:* Frank Sciorba, MD (Principal Investigator); James Luketich, MD (Co-Principal Investigator); Colleen Witt, MS (Principal Clinic Coordinator); Gerald Ayres; Michael Donahoe, MD; Carl Fuhrman, MD; Robert Hoffman, MD; Joan Lacomis, MD; Joan Sexton; William Slivka; Diane Strollo, MD; Erin Sullivan, MD; Tomeka Simon; Catherine Wrona, RN, BSN; Gerene Bauldoff, RN, MSN (1997-2000); Manuel Brown, MD (1997-2002); Elisabeth George, RN, MSN (Principal Clinic Coordinator 1997-2001); Robert Keenan, MD (Co-Principal Investigator 1997-2000); Theodore Kopp, MS (1997-1999); Laurie Silfies (1997-2001).

*University of Washington, Seattle, WA:* Joshua Benditt, MD (Principal Investigator), Douglas Wood, MD (Co-Principal Investigator); Margaret Snyder, MN (Principal Clinic Coordinator); Kymberley Anable; Nancy Battaglia; Louie Boitano; Andrew Bowdle, MD; Leighton Chan, MD; Cindy Chwalik; Bruce Culver, MD; Thurman Gillespy, MD; David Godwin, MD; Jeanne Hoffman; Andra Ibrahim, MD; Diane Lockhart; Stephen Marglin, MD; Kenneth Martay, MD; Patricia McDowell; Donald Oxorn, MD; Liz Roessler; Michelle Toshima; Susan Golden (1998-2000).

#### *Other participants*

*Agency for Healthcare Research and Quality, Rockville, MD:* Lynn Bosco, MD, MPH; Yen-Pin Chiang, PhD; Carolyn Clancy, MD; Harry Handelsman, DO.

*Centers for Medicare and Medicaid Services, Baltimore, MD:* Steven M Berkowitz, PhD; Tanisha Carino, PhD; Joe Chin, MD; JoAnna Baldwin; Karen McVeary; Anthony Norris; Sarah Shirey; Claudette Sikora Steven Sheingold, PhD (1997-2004).

*Coordinating Center, The Johns Hopkins University, Baltimore, MD:* Steven Piantadosi, MD, PhD (Principal Investigator); James Tonascia, PhD (Co-Principal Investigator); Patricia Belt; Amanda Blackford, ScM; Karen Collins; Betty Collison; Ryan Colvin, MPH; John Dodge; Michele Donithan, MHS; Vera Edmonds; Gregory L. Foster, MA; Julie Fuller; Judith Harle; Rosetta Jackson; Shing Lee, ScM; Charlene Levine; Hope Livingston; Jill Meinert; Jennifer Meyers; Deborah Nowakowski; Kapreena Owens; Shangqian Qi, MD; Michael Smith; Brett Simon, MD; Paul Smith; Alice Sternberg, ScM; Mark Van Natta, MHS; Laura Wilson, ScM; Robert Wise, MD.

*Online supplements are not copyedited prior to posting.*



*Cost Effectiveness Subcommittee:* Robert M. Kaplan, PhD (Chair); J. Sanford Schwartz, MD (Co-Chair); Yen-Pin Chiang, PhD; Marianne C. Fahs, PhD; A. Mark Fendrick, MD; Alan J. Moskowitz, MD; Dev Pathak, PhD; Scott Ramsey, MD, PhD; Steven Sheingold, PhD; A. Laurie Shroyer, PhD; Judith Wagner, PhD; Roger Yusen, MD.

*Cost Effectiveness Data Center, Fred Hutchinson Cancer Research Center, Seattle, WA:* Scott Ramsey, MD, PhD (Principal Investigator); Ruth Etzioni, PhD; Sean Sullivan, PhD; Douglas Wood, MD; Thomas Schroeder, MA; Karma Kreizenbeck; Kristin Berry, MS; Nadia Howlader, MS.

*CT Scan Image Storage and Analysis Center, University of Iowa, Iowa City, IA:* Eric Hoffman, PhD (Principal Investigator); Janice Cook-Granroth, BS; Angela Delsing, RT; Junfeng Guo, PhD; Geoffrey McLennan, MD; Brian Mullan, MD; Chris Piker, BS; Joseph Reinhardt, PhD; Blake Wood; Jered Sieren, RTR; William Stanford, MD.

*Data and Safety Monitoring Board:* John A. Waldhausen, MD (Chair); Gordon Bernard, MD; David DeMets, PhD; Mark Ferguson, MD; Eddie Hoover, MD; Robert Levine, MD; Donald Mahler, MD; A. John McSweeney, PhD; Jeanine Wiener-Kronish, MD; O. Dale Williams, PhD; Magdy Younes, MD.

*Marketing Center, Temple University, Philadelphia, PA:* Gerard Criner, MD (Principal Investigator); Charles Soltoff, MBA.

*Project Office, National Heart, Lung, and Blood Institute, Bethesda, MD:* Gail Weinmann, MD (Project Officer); Joanne Deshler (Contracting Officer); Dean Follmann, PhD; James Kiley, PhD; Margaret Wu, PhD (1996-2001).

*Other acknowledgments*

Arthur Gelb, MD, Lakewood Regional Medical Center, Lakewood, CA.

**e-Table 1. Baseline characteristics of participants included in the current analysis (median [Inter-quartile range, IQR]).**

| Characteristic                     | Full cohort†<br>[median, (IQR)] | Six-month follow-up<br>cohort^ [median,<br>(IQR)] |
|------------------------------------|---------------------------------|---------------------------------------------------|
| <i>N</i>                           | 396                             | 138                                               |
| Age, years                         | 68.0 (65.0,71.0)                | 68.1 (63.5,70.7)                                  |
| Body mass index, kg/m <sup>2</sup> | 24.4 (21.9,27.1)                | 24.9 (21.9,27.4)                                  |
| FEV <sub>1</sub> , % predicted     | 26.0 (21.0,31.0)                | 26.0 (22.0,31.0)                                  |
| FVC, % predicted                   | 66.0 (55.0,76.5)                | 66.0 (55.0,77.0)                                  |
| FEV <sub>1</sub> /FVC ratio        | 31.2 (26.4,35.9)                | 32.5 (28.4,37.3)                                  |
| TLC, % predicted                   | 129.0 (121.0,139.0)             | 130.0 (120.0,138.0)                               |
| RV, % predicted                    | 225.0 (197.5,254.0)             | 225.5 (194.0,256.0)                               |
| RV/TLC ratio                       | 65.6 (60.5,72.0)                | 65.1 (60.8,71.4)                                  |
| DL <sub>CO</sub> , % predicted     | 28.0 (21.0,34.0)                | 29.0 (22.0,35.0)                                  |
| SGRQ total score                   | 55.1 (45.5,66.3)                | 55.0 (45.3,64.6)                                  |
| SOBQ score                         | 67.0 (55.0,80.0)                | 65.0 (55.0,78.0)                                  |
| Exercise capacity, watts           | 35.0 (22.0,48.0)                | 35.0 (25.0,50.0)                                  |
| 6MWT distance, feet*               | 1166 (930,1346)                 | 1175 (967,1404)                                   |

Abbreviations: 6MWT, Six Minute Walk Test; DL<sub>CO</sub>, Diffusing capacity of Carbon Monoxide; IQR, Inter-quartile Range; SGRQ: St George's Respiratory Questionnaire; SOBQ, University of California at San Diego Shortness-of-breath Questionnaire; TLC, Total Lung Capacity.\* Obtained from the first walk.

† Group of patients who had data for a two-walk 6MWT at baseline and after rehabilitation but before randomization

^ Group of patients who had data for a two-walk 6MWT from randomization to LVRS or medical therapy  
Statistical comparison for all the above characteristics between the two groups was non-significant ( $p > 0.05$ )



**e-Table 2. Supplemental oxygen requirement in cohort of patients studied in NETT**

| Test                           | Percentage of patients needing oxygen | Oxygen requirement in liters/min [median, (IQR)] |
|--------------------------------|---------------------------------------|--------------------------------------------------|
| Pre-rehab                      |                                       |                                                  |
| First walk                     | 76.5%                                 | 3 (2-4)                                          |
| Second walk                    | 76.0%                                 | 3 (2-4)                                          |
| Post-rehab                     |                                       |                                                  |
| First walk                     | 78.8%                                 | 3 (2-4)                                          |
| Second walk                    | 78.8%                                 | 3 (2-4)                                          |
| 6-months after LVRS            |                                       |                                                  |
| First walk                     | 66.2%                                 | 3 (2-4)                                          |
| Second walk                    | 67.6%                                 | 3 (2-4)                                          |
| 6-months after medical therapy |                                       |                                                  |
| First walk                     | 70.3%                                 | 4 (2-5)                                          |
| Second walk                    | 70.3%                                 | 4 (2-5)                                          |

Abbreviations: IQR, Inter-quartile range; LVRS, Lung volume reduction surgery
